# Supplementary material
Source: publisher figshare collection journal article supplement (https://gsapubs.figshare.com/ndownloader/files/22740782)
Supplement: Supplementary file 1 [file 22740782]

Table DR1.  $^{40}\text{Ar}/^{39}\text{Ar}$  analytical data for Eocene rhyolite ash-flow tuffs in the Panther Creek half graben and outflow of the tuff of Challis Creek.

| <i>T</i><br>(°C)                                                                                                                                 | Radiogenic<br>$^{40}\text{Ar}^\dagger$ | K-derived<br>$^{39}\text{Ar}^\dagger$ | $^{40}\text{Ar}_\text{K}/^{39}\text{Ar}_\text{K}^\ddagger$ | Radiogenic<br>yield<br>(%) | %<br>$^{39}\text{Ar}$ total | $^{39}\text{Ar}/^{37}\text{Ar}^\S$ | Apparent age<br>& error (Ma<br>at 1 sigma) |
|--------------------------------------------------------------------------------------------------------------------------------------------------|----------------------------------------|---------------------------------------|------------------------------------------------------------|----------------------------|-----------------------------|------------------------------------|--------------------------------------------|
| <b>Sample 6-22-4: Tuffs of Castle Rock; 60.6 mg sanidine; Plateau date = 45.36 +/- .10 Ma; J-value = 0.007705 +/- 0.1%; 44°59'35" 114°21'34"</b> |                                        |                                       |                                                            |                            |                             |                                    |                                            |
| 700 p                                                                                                                                            | .41936                                 | .12582                                | 3.33                                                       | 34.2                       | 1.5                         | 51                                 | 45.7 +/- .4                                |
| 800 p                                                                                                                                            | .75570                                 | .22939                                | 3.294                                                      | 87.4                       | 2.6                         | 67                                 | 45.22 +/- .07                              |
| 850 p                                                                                                                                            | 1.4777                                 | .44960                                | 3.287                                                      | 95.8                       | 5.2                         | 55                                 | 45.1 +/- .3                                |
| 900 p                                                                                                                                            | 1.9587                                 | .59280                                | 3.304                                                      | 97.2                       | 6.8                         | 68                                 | 45.35 +/- .07                              |
| 950 p                                                                                                                                            | 2.5000                                 | .75780                                | 3.299                                                      | 97.8                       | 8.7                         | 61                                 | 45.28 +/- .08                              |
| 1000 p                                                                                                                                           | 3.2068                                 | .97169                                | 3.300                                                      | 98.2                       | 11.2                        | 81                                 | 45.30 +/- .07                              |
| 1050 p                                                                                                                                           | 3.7578                                 | 1.1370                                | 3.305                                                      | 98.8                       | 13.1                        | 67                                 | 45.37 +/- .07                              |
| 1100 p                                                                                                                                           | 4.1769                                 | 1.2618                                | 3.310                                                      | 99.0                       | 14.6                        | 65                                 | 45.44 +/- .07                              |
| 1150 p                                                                                                                                           | 4.4875                                 | 1.3546                                | 3.313                                                      | 99.2                       | 15.6                        | 66                                 | 45.47 +/- .07                              |
| 1200                                                                                                                                             | 3.9151                                 | 1.1826                                | 3.311                                                      | 98.7                       | 13.6                        | 64                                 | 45.44 +/- .07                              |
| 1250                                                                                                                                             | 1.4078                                 | .42316                                | 3.327                                                      | 96.5                       | 4.9                         | 51                                 | 45.66 +/- .10                              |
| 1400                                                                                                                                             | .61149                                 | .18557                                | 3.295                                                      | 93.9                       | 2.1                         | 25                                 | 45.23 +/- .07                              |
| Total                                                                                                                                            |                                        |                                       |                                                            |                            |                             |                                    |                                            |
| Gas                                                                                                                                              |                                        |                                       | 3.307                                                      |                            |                             |                                    | 45.39 +/- .09                              |

| <i>T</i><br>(°C)                                                                                                                                          | Radiogenic<br><sup>40</sup> Ar <sup>†</sup> | K-derived<br><sup>39</sup> Ar <sup>†</sup> | <sup>40</sup> Ar <sub>K</sub> / <sup>39</sup> Ar <sub>K</sub> <sup>‡</sup> | Radiogenic<br>yield<br>(%) | %<br><sup>39</sup> Ar total | <sup>39</sup> Ar/ <sup>37</sup> Ar <sup>§</sup> | Apparent age<br>& error (Ma<br>at 1 sigma) |     |     |
|-----------------------------------------------------------------------------------------------------------------------------------------------------------|---------------------------------------------|--------------------------------------------|----------------------------------------------------------------------------|----------------------------|-----------------------------|-------------------------------------------------|--------------------------------------------|-----|-----|
| <hr/>                                                                                                                                                     |                                             |                                            |                                                                            |                            |                             |                                                 |                                            |     |     |
| <b>Sample 93-1: Tufts of Challis Creek, outflow; 48.3 mg sanidine; Plateau date = 45.70 +/- .08 Ma; J-value = 0.007820 +/- 0.1%; 44°30'28" 114°14'20"</b> |                                             |                                            |                                                                            |                            |                             |                                                 |                                            |     |     |
| 700                                                                                                                                                       | .0219                                       | .0038                                      | 5.8                                                                        | 11.9                       | .1                          | 1.1                                             | 55                                         | +/- | 14  |
| 800                                                                                                                                                       | .2263                                       | .0651                                      | 3.48                                                                       | 33.3                       | 1.5                         | 13                                              | 48.4                                       | +/- | .7  |
| 900                                                                                                                                                       | .28337                                      | .0815                                      | 3.48                                                                       | 90.4                       | 1.9                         | 9.4                                             | 48.4                                       | +/- | .2  |
| 1000                                                                                                                                                      | .37158                                      | .1089                                      | 3.41                                                                       | 87.6                       | 2.5                         | 12                                              | 47.5                                       | +/- | .3  |
| 1100 p                                                                                                                                                    | 1.8872                                      | .57635                                     | 3.274                                                                      | 97.4                       | 13.2                        | 41                                              | 45.61                                      | +/- | .07 |
| 1150 p                                                                                                                                                    | 2.2674                                      | .69257                                     | 3.274                                                                      | 98.0                       | 15.9                        | 50                                              | 45.60                                      | +/- | .07 |
| 1200 p                                                                                                                                                    | 2.5454                                      | .77468                                     | 3.286                                                                      | 98.1                       | 17.7                        | 66                                              | 45.77                                      | +/- | .07 |
| 1250 p                                                                                                                                                    | 1.4723                                      | .44834                                     | 3.284                                                                      | 98.2                       | 10.3                        | 39                                              | 45.74                                      | +/- | .10 |
| 1350 p                                                                                                                                                    | 1.9602                                      | .59652                                     | 3.286                                                                      | 97.7                       | 13.7                        | 57                                              | 45.77                                      | +/- | .09 |
| 1450                                                                                                                                                      | 3.3630                                      | 1.0205                                     | 3.296                                                                      | 98.3                       | 23.4                        | 44                                              | 45.90                                      | +/- | .07 |
| Total                                                                                                                                                     |                                             |                                            |                                                                            |                            |                             |                                                 |                                            |     |     |
| Gas                                                                                                                                                       |                                             |                                            | 3.296                                                                      |                            |                             |                                                 | 45.91                                      | +/- | .10 |

| <i>T</i><br>(°C)                                                                                                                                                                      | Radiogenic<br><sup>40</sup> Ar† | K-derived<br><sup>39</sup> Ar† | <sup>40</sup> Ar <sub>K</sub> / <sup>39</sup> Ar <sub>K</sub> <sup>‡</sup> | Radiogenic<br>yield<br>(%) | %<br><sup>39</sup> Ar total | <sup>39</sup> Ar/ <sup>37</sup> Ar <sup>§</sup> | Apparent age<br>& error (Ma<br>at 1 sigma) |     |     |
|---------------------------------------------------------------------------------------------------------------------------------------------------------------------------------------|---------------------------------|--------------------------------|----------------------------------------------------------------------------|----------------------------|-----------------------------|-------------------------------------------------|--------------------------------------------|-----|-----|
| <b>Sample 6-18-10: Fractured ash flow tuff on ridge west of Moyer Creek; 55.8 mg sanidine; Plateau date = 45.73<br/>+/- .10 Ma; J-value = 0.007768 +/- 0.1%; 44°58'41" 114°18'16"</b> |                                 |                                |                                                                            |                            |                             |                                                 |                                            |     |     |
| 700                                                                                                                                                                                   | .0278                           | .0095                          | 2.92                                                                       | 16.6                       | .2                          | 10                                              | 40                                         | +/- | 3.  |
| 800                                                                                                                                                                                   | .2447                           | .0741                          | 3.30                                                                       | 36.1                       | 1.4                         | 122                                             | 45.7                                       | +/- | 1.0 |
| 850                                                                                                                                                                                   | .21840                          | .0673                          | 3.24                                                                       | 82.9                       | 1.2                         | 32                                              | 44.9                                       | +/- | .9  |
| 900                                                                                                                                                                                   | .26920                          | .08261                         | 3.259                                                                      | 93.0                       | 1.5                         | 30                                              | 45.1                                       | +/- | .5  |
| 950                                                                                                                                                                                   | .36232                          | .11208                         | 3.233                                                                      | 93.1                       | 2.1                         | 30                                              | 44.7                                       | +/- | .2  |
| 1000 p                                                                                                                                                                                | .65443                          | .19797                         | 3.306                                                                      | 97.5                       | 3.6                         | 41                                              | 45.74                                      | +/- | .11 |
| 1050 p                                                                                                                                                                                | 1.1089                          | .33509                         | 3.309                                                                      | 98.5                       | 6.2                         | 58                                              | 45.79                                      | +/- | .11 |
| 1100 p                                                                                                                                                                                | 1.5320                          | .46438                         | 3.299                                                                      | 98.2                       | 8.6                         | 51                                              | 45.65                                      | +/- | .08 |
| 1150 p                                                                                                                                                                                | 1.6853                          | .51258                         | 3.288                                                                      | 97.9                       | 9.4                         | 51                                              | 45.50                                      | +/- | .10 |
| 1200 p                                                                                                                                                                                | 2.7621                          | .83860                         | 3.294                                                                      | 98.6                       | 15.4                        | 56                                              | 45.58                                      | +/- | .10 |
| 1250 p                                                                                                                                                                                | 2.9553                          | .89379                         | 3.306                                                                      | 99.0                       | 16.5                        | 43                                              | 45.75                                      | +/- | .07 |
| 1300 p                                                                                                                                                                                | 1.9164                          | .57926                         | 3.308                                                                      | 96.5                       | 10.7                        | 49                                              | 45.78                                      | +/- | .15 |
| 1450                                                                                                                                                                                  | 4.1860                          | 1.2612                         | 3.319                                                                      | 98.2                       | 23.2                        | 24                                              | 45.92                                      | +/- | .07 |
| Total                                                                                                                                                                                 |                                 |                                |                                                                            |                            |                             |                                                 |                                            |     |     |
| Gas                                                                                                                                                                                   |                                 |                                | 3.302                                                                      |                            |                             |                                                 | 45.68                                      | +/- | .13 |

Mineral separates were prepared by magnetic separator and heavy-liquid methods and hand picked; grains from the tuff of Castle Rock were 80-120 mesh size whereas grains from the fractured rhyolite tuff and tuff of Challis Creek were crystals about 2 mm in size. Separates were then hand-picked to greater than 99% purity. Individual samples ranged in mass from 48-61 mg, and were cleaned with reagent-grade acetone and de-ionized water in an ultrasonic bath, air dried, wrapped in aluminum foil boats and sealed in silica vials along with monitor minerals prior to irradiation. Samples were irradiated for 30 hours at 1 MW at the TRIGA reactor at the U.S. Geological Survey in Denver, Colorado.

<sup>†</sup>Abundances of 'Radiogenic <sup>40</sup>Ar' and 'K-derived <sup>39</sup>Ar' are reported in volts. Conversion to moles can be made using  $9.736 \times 10^{-13}$  moles argon per volt of signal. Analytical data for 'Radiogenic <sup>40</sup>Ar' and 'K-derived <sup>39</sup>Ar' are calculated to five places; <sup>40</sup>Ar/<sup>39</sup>Ar is calculated to three decimal places. 'Radiogenic <sup>40</sup>Ar', 'K-derived <sup>39</sup>Ar' and '<sup>40</sup>Ar/<sup>39</sup>Ar<sub>K</sub>' are rounded to significant figures using analytical precisions. Apparent ages and associated errors were calculated from unrounded analytical data and then rounded using associated errors. All analyses were done in the Argon Laboratory, U.S. Geological Survey, Denver, Colorado. Decay constants are from Steiger and Jager (1977). The irradiation monitor MMhb-1 (1.555 wt% K), with an age of 520.4 Ma (Samson and Alexander, 1987) was used to calculate J values for the analyses.

<sup>‡</sup>A Mass Analyzer Products 215 Rare Gas mass spectrometer with a Faraday cup with a sensitivity of  $9.736 \times 10^{-13}$  moles/V and a detection limit of  $2 \times 10^{-17}$  moles Ar was used to measure argon isotope composition; corrections for volume, mass fractionation, trap current, radioactive decay of <sup>37</sup>Ar and <sup>39</sup>Ar and interfering Ar isotopes were made. Production ratios measured on pure K<sub>2</sub>SO<sub>4</sub> and CaF<sub>2</sub> salts irradiated with the samples were used to correct for irradiation-produced <sup>40</sup>Ar (from K) and <sup>39</sup>Ar (from Ca). Corrections for Cl-derived <sup>36</sup>Ar were determined using the method of Roddick (1983). Production ratios determined for the samples are: <sup>37</sup>Ar<sub>K</sub>/<sup>39</sup>Ar<sub>K</sub>,  $5.5 \times 10^{-5}$ ; <sup>38</sup>Ar<sub>K</sub>/<sup>39</sup>Ar<sub>K</sub>,  $1.313 \times 10^{-2}$ ; <sup>40</sup>Ar<sub>K</sub>/<sup>39</sup>Ar<sub>K</sub>,  $7.95 \times 10^{-3}$ ; <sup>39</sup>Ar<sub>Ca</sub>/<sup>37</sup>Ar<sub>Ca</sub>,  $6.60 \times 10^{-4}$ ; <sup>36</sup>Ar<sub>Ca</sub>/<sup>37</sup>Ar<sub>Ca</sub>,  $2.80 \times 10^{-4}$ ; <sup>38</sup>Ar<sub>Ca</sub>/<sup>37</sup>Ar<sub>Ca</sub>,  $5.6 \times 10^{-5}$ . The reproducibility of split gas fractions from each monitor (0.15-0.35%, 1 sigma) were used to calculate imprecisions in J.J values were interpolated from adjacent monitors and have similar uncertainties to the monitors. Uncertainties in calculations for the date of individual steps in a spectrum were calculated using the equations of Dalrymple and others (1981).

<sup>§</sup>To calculate apparent K/Ca ratios, divide the <sup>39</sup>Ar/<sup>37</sup>Ar value by 2.

<sup>¶</sup>Fraction included in plateau or preferred date.
